# Supplementary material
Source: publisher site journal article supplement (https://www.dovepress.com/article/182206)
Supplement: Supplementary file 1 [file get_supplementary_file.php]

## **Artificially-controlled Degradable Nanoparticles for Contrast Switch MRI and Programmed Cancer Therapy**

Tianyang Yun <sup>1</sup>, Yuxin Liu <sup>2</sup>, Shaoqiong Yi <sup>1</sup>, Qi Jia <sup>2</sup>, Yang Liu <sup>1\*</sup>, Jing Zhou <sup>2\*</sup>

1 Department of Thoracic Surgery, Chinese People's Liberation Army General Hospital, Beijing 100853, People's Republic of China

2 Department of Chemistry, Capital Normal University, Beijing 100048, People's Republic of China

E-mail: [sunny301x@sina.com](mailto:sunny301x@sina.com); [jingzhou@cnu.edu.cn](mailto:jingzhou@cnu.edu.cn)

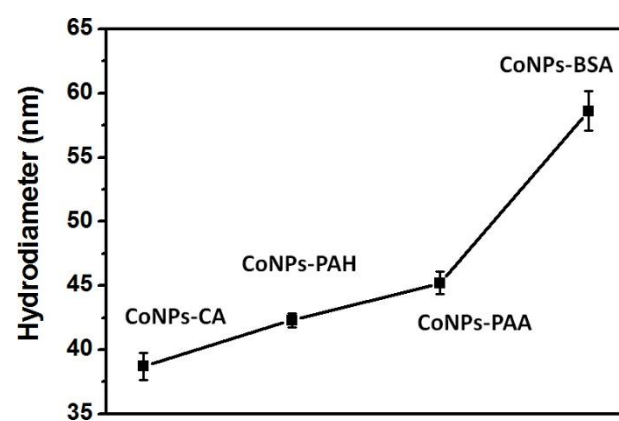

**Figure S1.** Hydrodiameter of CoNPs-CA, CoNPs-PAH, CoNPs-PAA, and CoNPs-BSA.

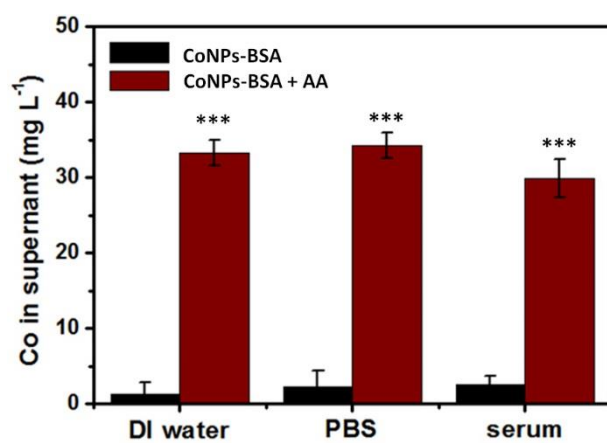

**Figure S2.** Cobalt amount in the supernatant of CoNPs-BSA solution of DI water, PBS, and serum in the absence and presence of AA.

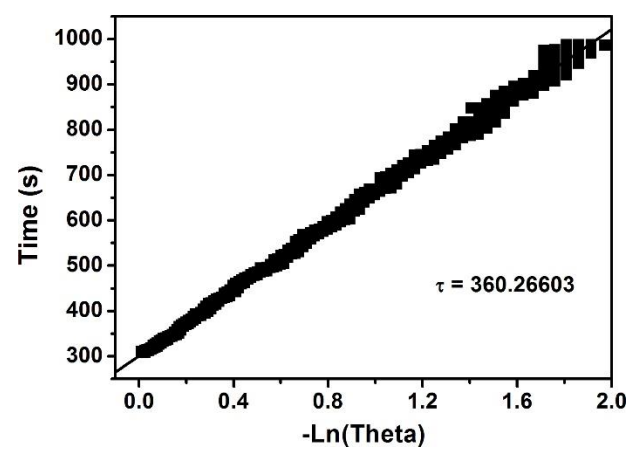

**Figure S3.** Linear time data vs  $-\text{Ln}(\text{Theta})$  obtained from the cooling period.

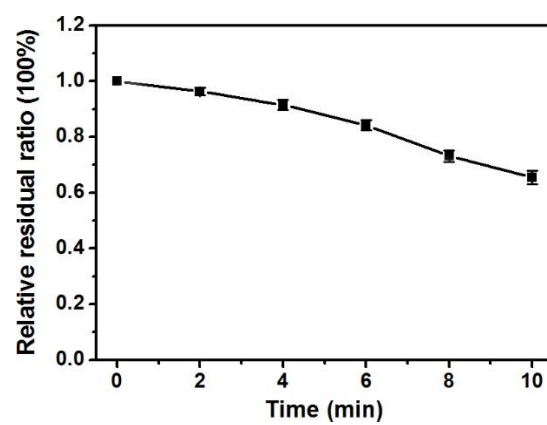

**Figure S4.** Degradation ratio of CoNPs-BSA in AA presence within 10 min.

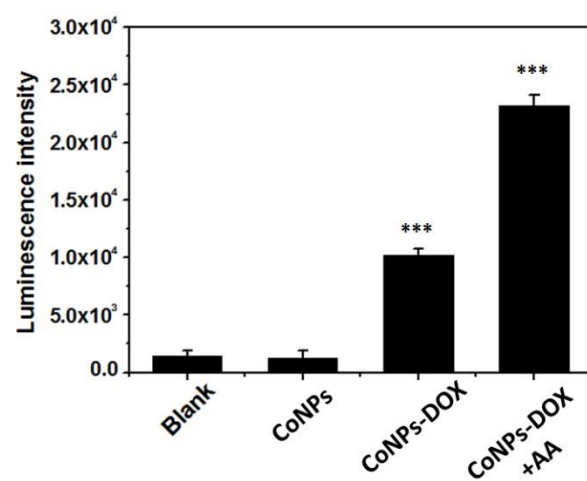

**Figure S5.** Luminescence intensity of the tumor harvested from the mice receiving PBS injection

(Blank), CoNPs injection, CoNPs-DOX injection, and CoNPs-DOX and AA injection.

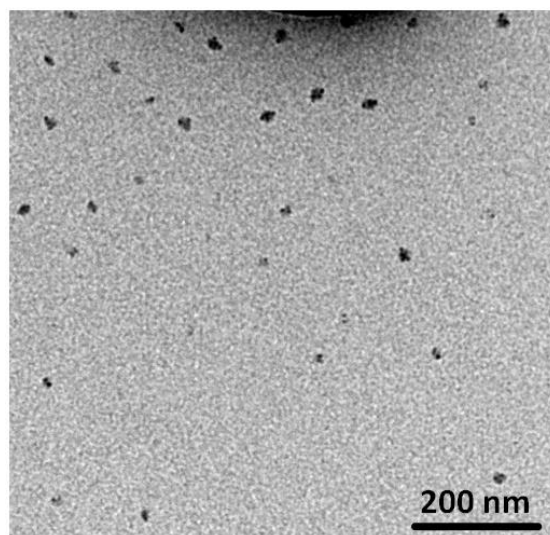

**Figure S6.** TEM images of CoNPs-DOX obtained from urine after AA injection.
